# Supplementary material for: Accelerated Antarctic ice loss through ocean forced changes in subglacial hydrology
Source: Research Square preprint supplement (doi:10.21203/rs.3.rs-2464588/v1), 2023-02-01
Supplement: Supplementary file 1 [file 47268ab7602ca11292ed0f46.xlsx]

## Sheet: Sheet1
Sample Name	mineralogy	Th (ppm)	U (ppm)	[232Th/238U]	%2σ unc	[230Th/232Th]	%2σ unc	[234U/238U]	%2σ unc	[230Th/238U]	%2σ unc	U-Th age (ka)	Th-corrected age(ka)	2σ unc	[234U / 238U]i	2σ unc
PRR52588_3_1	Calcite	0.475378	27.7851	0.0175508	0.0777271	270.289	0.298405	2.15079	0.096273	1.50865	0.308362	114.479	114.284	0.59631	2.58964	0.00322005
PRR52588_1_2_1	Calcite	0.291836	19.0815	0.0156891	1.83595	303.602	1.8331	2.15524	0.0608025	1.51484	2.59441	114.842	114.664	4.73708	2.59746	0.0213662
PRR52588_3_2	Calcite	0.209512	19.0519	0.0112809	0.163634	421.555	0.944969	2.15604	0.12065	1.51239	0.959032	114.456	114.338	1.76138	2.59679	0.00825726
PRR52588_1	Calcite	0.219622	17.4791	0.0128892	0.108625	367.619	0.362822	2.15928	0.218636	1.50692	0.378733	113.515	113.375	0.800848	2.59702	0.00552602
PRR52588_3_5	Calcite	0.111669	17.2563	0.00663829	0.0761907	710.861	0.27985	2.16742	0.0870174	1.50074	0.290036	112.077	112.004	0.535509	2.60171	0.00295944
PRR52588_2	Calcite	0.178105	18.1898	0.0100443	0.124578	468.692	0.398133	2.16265	0.244544	1.49717	0.417168	112.071	111.958	0.868998	2.59515	0.00616165
PRR52588_3_11	Calcite	0.37744	19.0056	0.0203722	0.261448	227.939	0.336339	2.16474	0.0878929	1.4768	0.426004	109.524	109.298	0.750988	2.58658	0.00374066
PRR52588_9	Calcite	0.478782	16.7647	0.0292963	0.264133	158.157	0.570925	2.16595	0.252637	1.47355	0.629064	109.052	108.729	1.16442	2.5861	0.00722052
PRR52588_3_13	Calcite	0.833108	20.8304	0.0410274	0.216626	111.93	0.386248	2.14965	0.191631	1.46045	0.442848	108.896	108.44	0.854797	2.56325	0.00524314
PRR52588_3_14	Calcite	1.24809	18.879	0.0678167	0.17647	67.861	0.27893	2.15503	0.0719311	1.4636	0.330066	108.813	108.058	0.680149	2.57018	0.00290691
PRR52588_10_2	Calcite	1.01557	19.7806	0.0526676	0.253	86.4443	1.66735	2.15084	0.25573	1.44792	1.68643	107.367	106.781	2.84744	2.55814	0.0134246
PRR53557_3_2_2	Calcite	0.07758	17.9275	0.00443916	0.174821	1049.35	0.543252	2.19546	0.187127	1.48145	0.570689	107.55	107.501	1.00202	2.61936	0.00591706
PRR53557_3_3	Calcite	0.25958	17.2213	0.0154624	0.0580342	297.257	0.299605	2.16268	0.279252	1.46175	0.305174	107.973	107.802	0.710868	2.57683	0.00638476
PRR53557_3_4	Calcite	0.0290046	16.8864	0.00176198	0.202759	2620.29	0.513589	2.16272	0.581539	1.4683	0.552164	108.721	108.704	1.39327	2.58017	0.0131253
PRR53557_3_6	Calcite	0.0252273	13.4211	0.00192821	0.232304	2403.95	0.866219	2.17334	0.224558	1.47416	0.896828	108.518	108.494	1.56012	2.59376	0.00830722
PRR53557_3_10	Calcite	0.0635673	14.9033	0.00437544	0.149524	1043.89	0.396856	2.16105	0.218704	1.45259	0.42409	107.062	107.016	0.794318	2.57059	0.00562481
PRR53557_3_12	Calcite	0.0816239	15.1772	0.00551691	0.0406763	847.14	0.210476	2.17378	0.281943	1.48633	0.21437	109.869	109.807	0.62925	2.60044	0.00625402
PRR53557_3_14	Calcite	0.21819	23.9907	0.0093296	0.190805	503.589	0.524941	2.15645	0.128693	1.49418	0.558542	112.254	112.151	1.01659	2.58746	0.00519154
PRR53557_3_17	Calcite	0.11421	17.0498	0.00687156	0.327157	689.508	1.2924	2.16329	0.136512	1.50681	1.33317	113.151	113.075	2.39337	2.6009	0.0110982
PRR53557_3_19	Calcite	0.0682149	18.4281	0.00379726	0.113305	1237.02	1.42507	2.15773	0.079887	1.49387	1.42957	112.12	112.072	2.51869	2.58861	0.0114048
PRR53557_3_21	Calcite	0.0869869	19.888	0.00448676	0.0875207	1056.35	0.246658	2.15987	0.301771	1.50732	0.261725	113.513	113.464	0.741363	2.5978	0.00671641
PRR53557c_2_3	Calcite	0.0466341	18.0717	0.00264712	0.118449	1798.85	0.176652	2.15697	0.092682	1.51438	0.212688	114.612	114.583	0.425979	2.59877	0.00260738
PRR53557c_2_2	Calcite	0.0226937	6.03296	0.00385873	0.268008	1236.52	0.405437	2.15373	0.0953056	1.51744	0.486012	115.274	115.229	0.909316	2.59728	0.00447899
