# Supplementary material for: Accelerated Antarctic ice loss through ocean forced changes in subglacial hydrology
Source: Research Square preprint supplement (doi:10.21203/rs.3.rs-2464588/v1), 2023-02-01
Supplement: Supplementary file 2 [file 7ed1ec340fb835312e0e0b67.xlsx]

## Sheet: Sheet1
			UC Santa Cruz Stable Isotope Laboratory
			Thermo Fisher Scientific Kiel IV-MAT 253 Results
			Measured 03Nov2019 to 16Jan2021
Sample identifier	δ13C (‰ VPDB)	δ18O (‰ VPDB)	Yield µmol CO2	Equivalent µg CaCO3	Initial mV44	δ18O (‰ SMOW, WATER @ 273.15 K)
PRR_52588_ 1	-18.18	-51.83	0.7	70	12528.3	-54.8423
PRR_52588_ 2	-18.35	-52.27	0.59	59	9595.31	-55.2809
PRR_52588_ 3	-18.14	-51.7	0.5	50	7507.89	-54.7127
PRR_52588_ 5	-18.28	-51.96	0.71	71	12543.4	-54.9719
PRR_52588_ 6	-18.13	-51.99	0.73	73	13098.9	-55.0018
PRR_52588_ 7	-18.14	-51.79	0.25	25	3309.78	-54.8025
PRR_52588_ 8	-18.01	-51.91	0.76	76	14051.9	-54.9221
PRR_52588_ 9	-17.88	-51.9	0.42	42	5823.18	-54.9121
PRR_52588_ 10	-17.95	-51.91	0.46	46	6546.88	-54.9221
PRR53557_3_2	-17.77	-51.2	0.97	97	1.02	-54.2143
PRR53557_3_6	-17.99	-51.62	1.04	104	1.04	-54.633
PRR53557_3_8	-18	-51.67	0.8	80	1.02	-54.6828
PRR53557_3_10	-18.11	-51.6	0.71	71	1.01	-54.6131
PRR53557_3_12	-18.21	-51.33	0.75	75	1.02	-54.3439
PRR53557_3_14	-17.92	-51.21	0.85	85	1	-54.2243
PRR53557_3_15	-18.11	-51.67	0.88	88	1	-54.6828
PRR53557_3_17	-18.03	-51.63	0.85	85	1	-54.643
PRR53577_3_19	-18.09	-52.09	0.89	89	1	-55.1015
PRR53557_3_21	-18.03	-51.86	0.87	87	1	-54.8722
PRR53557_3_23	-18.03	-51.79	1.03	103	1.02	-54.8025
PRR53557_2_2	-18.1	-51.87	0.81	81	1	-54.8822
PRR53557_2_3	-17.9	-51.46	0.77	77	1	-54.4735
PRR53557_T1	-17.95	-51.87	1.06	106	1.04	-54.8822
