# Supplementary material for: Accelerated Antarctic ice loss through ocean forced changes in subglacial hydrology
Source: Research Square preprint supplement (doi:10.21203/rs.3.rs-2464588/v1), 2023-02-01
Supplement: Supplementary file 3 [file 8027f806a984ef2880eab521.xlsx]

## Sheet: Sheet1
Sample Identifier	87Sr/86Sr	STD err% (1 sigma)
PRR52588-1 Sr	0.71686	0.00150007
PRR52588-2 Sr	0.716751	0.000924818
PRR52588-3 Sr	0.716766	0.000682118
PRR52588-4 Sr	0.716442	0.000741895
PRR52588-7 Sr	0.716621	0.000865675
PRR52588-8 Sr	0.716417	0.000662274
PRR52588-9 Sr	0.716087	0.000626831
PRR52588-10 Sr	0.716099	0.000651201
PRR52588_B	0.71679	0.00148701
PRR52588_3_1	0.716719	0.00829984
PRR52588_3_2	0.716776	0.000769737
PRR52588_3_4	0.716935	0.000837347
PRR52588_3_5	0.716747	0.000779672
PRR52588_3_6	0.716632	0.000669936
PRR52588_3_7	0.716568	0.00261244
PRR52588_3_8	0.716588	0.000563066
PRR52588_3_9	0.71662	0.000707065
PRR52588_3_10	0.716544	0.000996051
PRR52588_3_11	0.716221	0.000779846
PRR52588_3_12	0.71612	0.000482953
PRR52588_3_13	0.716012	0.000746494
PRR52588_3_14	0.716232	0.000725493
PRR53557_3_2 Sr	0.715952	0.00111265
PRR53557_3_3 Sr	0.716188	0.00103734
PRR53557_3_6 Sr	0.716206	0.00091055
PRR53557_3_8_2 Sr	0.716533	0.000547293
PRR53557_3_10 Sr	0.716802	0.000601658
PRR53557_3_12 Sr	0.716232	0.00196353
PRR53557_3_14 Sr	0.716762	0.000715415
PRR53557_3_15 Sr	0.716794	0.000626975
PRR53557_3_17 Sr	0.716734	0.00285004
PRR53557_3_19 Sr	0.716812	0.00123885
PRR53557_3_21 Sr	0.717028	0.000657286
PRR53557_3_23 Sr	0.716874	0.0017941
PRR53557_2_3 Sr	0.716807	0.000680403
PRR53557_2_2 Sr	0.716829	0.000655612
PRR53557_3_T1 Sr	0.716836	0.000557893
